# Supplementary material for: CD38 Causes Autophagic Flux Inhibition and Cardiac Dysfunction Through a Transcriptional Inhibition Pathway Under Hypoxia/Ischemia Conditions
Source: PubMed Central journal article supplement (PMC7180518; doi:10.3389/fcell.2020.00191), 2020-04-17
Supplement: Presentation_1.pdf [file Presentation_1.pdf]

## Supplementary Figure Legends

### Fig. S1. Genetic testing, the effect of viral intervention and the degree of burns.

**a.** Genetic mutations of CD38. **b-c.** Representative Western blot and analysis of identification of Ad-CD38 adenovirus. **d.** Immunohistochemical image showed the full skin scald of mice. **e-h.** Identification of adenovirus of Ad-PLEKHM1 and si-PLEKHM1. **i-j.** Representative Western blot and analysis of identification of sh-sirt1 adenovirus. **k-n.** Identification of Ad-Rab7 adenoviruses and siRNA-Rab7. Data were shown as the mean  $\pm$  SEM. \*\*P < 0.01, \*\*\*P < 0.001, ns, not statistically significant. P values were derived from one-way ANOVA with Bonferroni's post-test.

### Fig. S2. CD38 is unnecessary for autophagic induction in the heart.

**a-d.** Representative immunoblots and analyses of AMPK/m-TOR pathway-related proteins prepared in the cytosolic fractions from heart homogenates. **e-h.** Representative immunoblots of AMPK/m-TOR pathway-related proteins in cardiomyocytes (CMs). Data were shown as the mean  $\pm$  SEM. \*P < 0.05, \*\*P < 0.01, \*\*\*P < 0.001, ns, not statistically significant. P values were derived from one-way ANOVA with Bonferroni's post-test.

### Fig. S3. Effect of CD38 on the mRNA and protein level of LC3-II and P62 .

**a-b.** Representative RT-qPCR analyses depicting LC3-II and P62 in CMs (a) and the hearts of mice (b). **c-d.** Representative immunoblots analyses of LC3-II and P62 in CMs (c) and the hearts of mice (d) corresponding to figure. 3a and d. Quantitative analyses were shown as the mean  $\pm$  SEM. \*P < 0.05, \*\*P < 0.01, \*\*\*P < 0.001, ns, not statistically significant. P values were derived from one-way ANOVA with Bonferroni's post-test.

### Fig. S4. Effect of CD38 on lysosomal pH and CD38 mediates CMs injury through PLEKHM1 and Rab7.

**a-b.** WT and *CD38*<sup>-/-</sup> CMs were stained with LysoSensor (green) and LysoTracker (red) and then analyzed by fluorescence microscopy. **c-d.** Representative images and quantitative analysis showed CMs apoptosis using TUNEL staining. **e-f.** Cell viability was determined using CCK-8 assays, and lactate dehydrogenase (LDH) release assays were used to determine CMs injury under H/I conditions. Data were shown as the mean  $\pm$  SEM. \*P < 0.05, \*\*\*P < 0.001, #P < 0.01, ns, not statistically significant. P values were derived from one-way ANOVA with Bonferroni's post-test.

### Fig. S5. CD38 regulates the H/I-related cardiac NAD decline and sirt1 activity under H/I conditions.

**a-c.** Representative immunoblots and analyses of other nicotinamide adenine dinucleotide (NAD)-consuming enzymes. **d.** CD38 altered sirtuins activity, especially Sirt1 activity. **e.** The NAD level regulated by NAD or FK866 in WT and CD38KO mice was measured by a NAD/NADH Quantitation Colorimetric Kit. **f.** Sirt1 activity regulated by the NAD level was measured. Data were shown as the mean  $\pm$  SEM. \*P < 0.05, \*\*P < 0.01, \*\*\*P < 0.001, ns, not statistically significant. P values were derived from one-way ANOVA with Bonferroni's post-test.

### Fig. S6. CD38 has the ability to bind the promoter sequences of some transcription factors.

ChIP-seq assays confirmed CD38 binding to the promoters of some transcriptional factor in WT neonatal cardiomyocytes with or without hypoxic/ischemic (H/I) treatment. Glyceraldehyde 3-phosphate dehydrogenase (GAPDH) served as a negative control.

### Fig. S7. CD38 regulates mitochondrial apoptosis through autophagic flux rather than oxidative stress or metabolic disorders.

**a.** ATP levels were detected and normalized to the percentage in normoxic WT neonatal CMs. **b.** MitoSOX levels were detected by flow cytometry. **c.** Representative confocal images of mRFP-GFP-LC3 puncta regulated by NAD level in CMs were shown. **d-e.** Immunoblots analysis revealed the protein levels of caspase-3 (cleaved) and cytochrome C (cytoplasm). **f.** Expression of various glutaminolysis and lipolysis-associated genes and oxidative stress-related genes using RT-qPCR. Data were shown as the mean  $\pm$  SEM. \*P < 0.05, \*\*P < 0.01, \*\*\*P < 0.001, ns, not statistically significant. P values were derived from one-way ANOVA with Bonferroni's post-test.
